# Supplementary material
Source: PubMed Central journal article supplement (PMC9487506)
Supplement: aac.00408-22-s0001.pdf [file aac.00408-22-s0001.pdf]

Supplemental Figure 1. Cumulative proportion of patients with incident anemia (A) and thrombocytopenia (B) during linezolid therapy for MDR-TB.

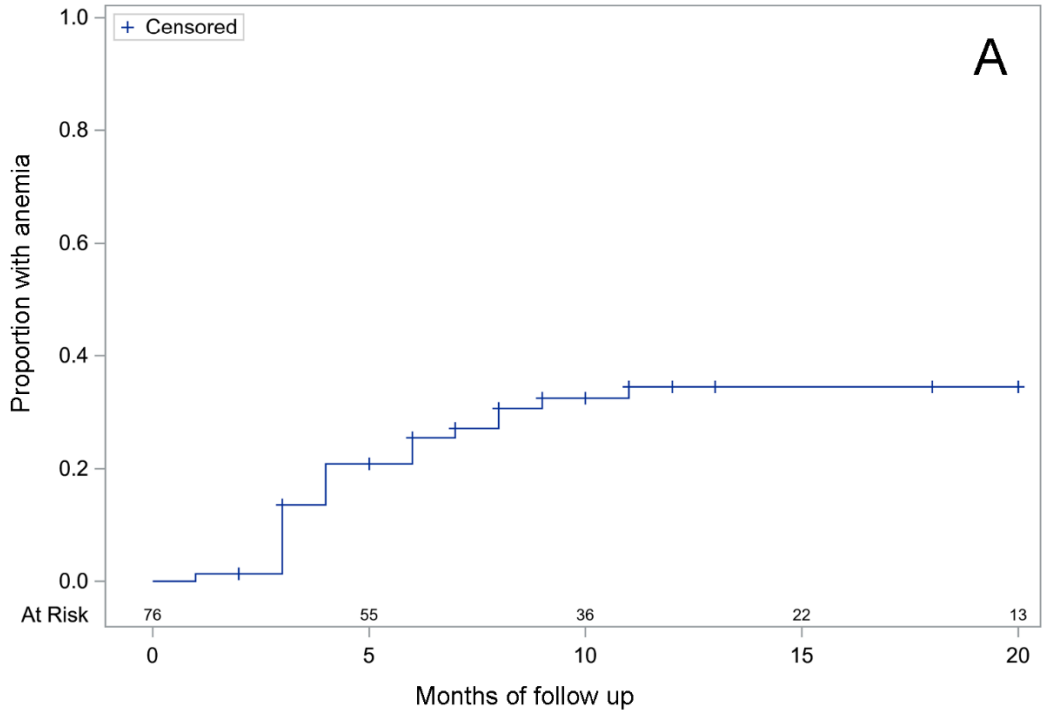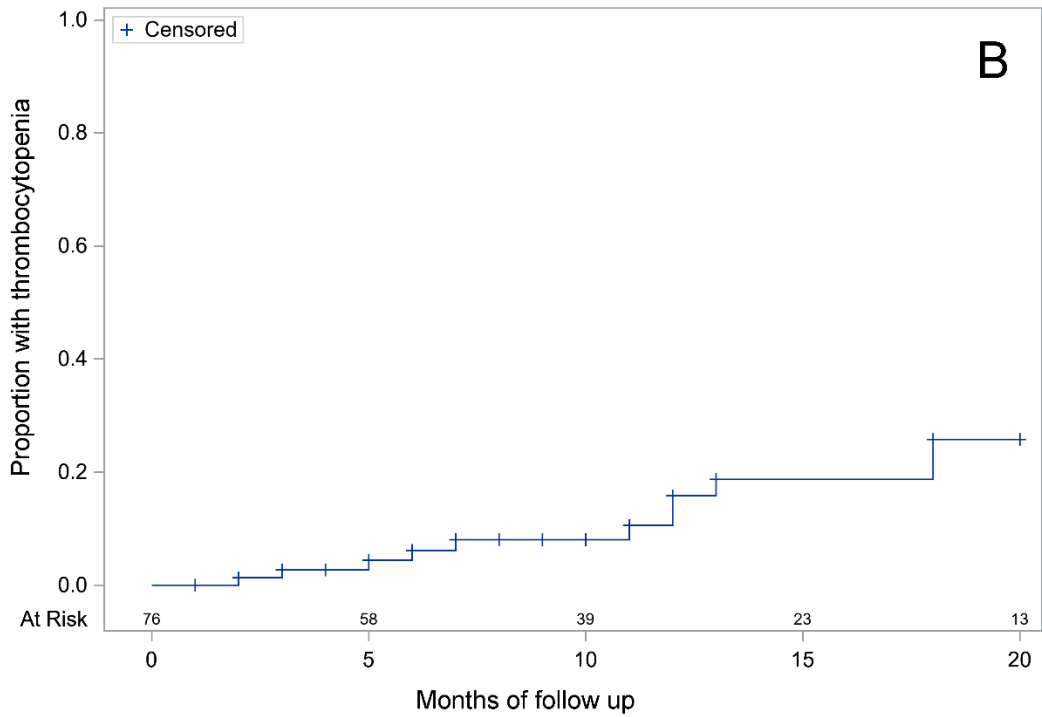

Supplemental Table 1. Univariate analysis evaluating covariates for models.

| <b>Variable</b>   | <b>Any AE<br/>(OR, 95% CI)</b> | <b>Thrombocytopenia AE<br/>(OR, 95% CI)</b> | <b>Anemia AE<br/>(OR, 95% CI)</b> |
|-------------------|--------------------------------|---------------------------------------------|-----------------------------------|
| Female gender     | 2.79 (0.92, 8.42)              | 1.37 (0.32, 5.84)                           | 3.62 (1.17, 11.1)                 |
| Age               | 1.01 (0.97, 1.04)              | 0.99 (0.95, 1.05)                           | 1.01 (0.97, 1.05)                 |
| Alcohol use (any) | 1.27 (0.47, 3.43)              | 1.38 (0.36, 5.28)                           | 1.35 (0.48, 3.84)                 |
| HCV antibody      | 1.54 (0.54, 4.41)              | 1.15 (0.27, 4.86)                           | 1.49 (0.50, 4.48)                 |

Abbreviations: AE = adverse event; OR = odds ratio; CI = confidence interval; HCV = hepatitis C virus
